# Supplementary material
Source: PubMed Central journal article supplement (PMC2935932)
Supplement: NIHMS232483-supplement-Supplemental_data.pdf [file NIHMS232483-supplement-Supplemental_data.pdf]

## **Supplementary data for manuscript:**

**Phagocytosis and phagosome acidification are required for pathogen processing and MyD88-dependent responses to *Staphylococcus aureus*.**

WK Eddie Ip<sup>1\*§</sup>, Anna Sokolovska<sup>1\*</sup>, Guillaume M Charriere<sup>1</sup>, Laurent Boyer<sup>1</sup>,  
Stephanie Dejardin<sup>1</sup>, Michael P Cappillino<sup>1</sup>, L Michael Yantosca<sup>1</sup>, Kazue Takahashi<sup>1</sup>,  
Kathryn, J Moore<sup>2</sup>, Adam Lacy-Hulbert<sup>1</sup> and Lynda M Stuart<sup>1†</sup>.

<sup>1</sup>Developmental Immunology and <sup>2</sup>Lipid Metabolism Unit,  
Massachusetts General Hospital/Harvard Medical School, Boston, MA 02144, USA

**Supplementary Figure SF1. Internalization and phagosome formation is required for IL-6 response to Gram-positive but not Gram-negative pathogens.**

**Supplementary Figure SF2. Intracellular TNF- $\alpha$  production in macrophages with defined bacterial loads.**

**Supplementary Figure SF3. The nature of the ligand, and not the receptor, determines the need for internalization**

**Supplementary Table ST1. Protease inhibitor targets.**

a

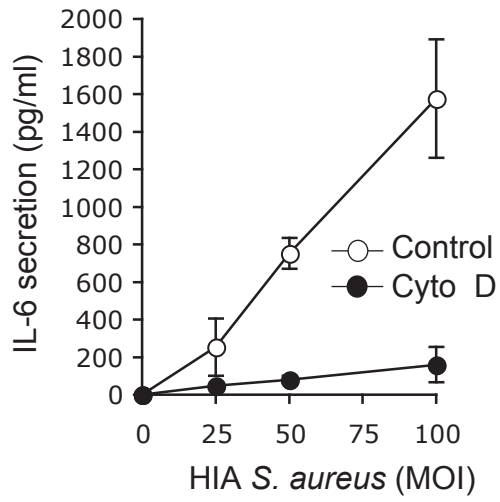

**Supplementary Figure 1. Internalization and phagosome formation is required for IL-6 response to Gram-positive but not Gram-negative pathogens.**

a) IL-6 production by control (white circles) and cytochalasin D treated macrophages (black circles) exposed to increasing MOI of HIA *S. aureus*.

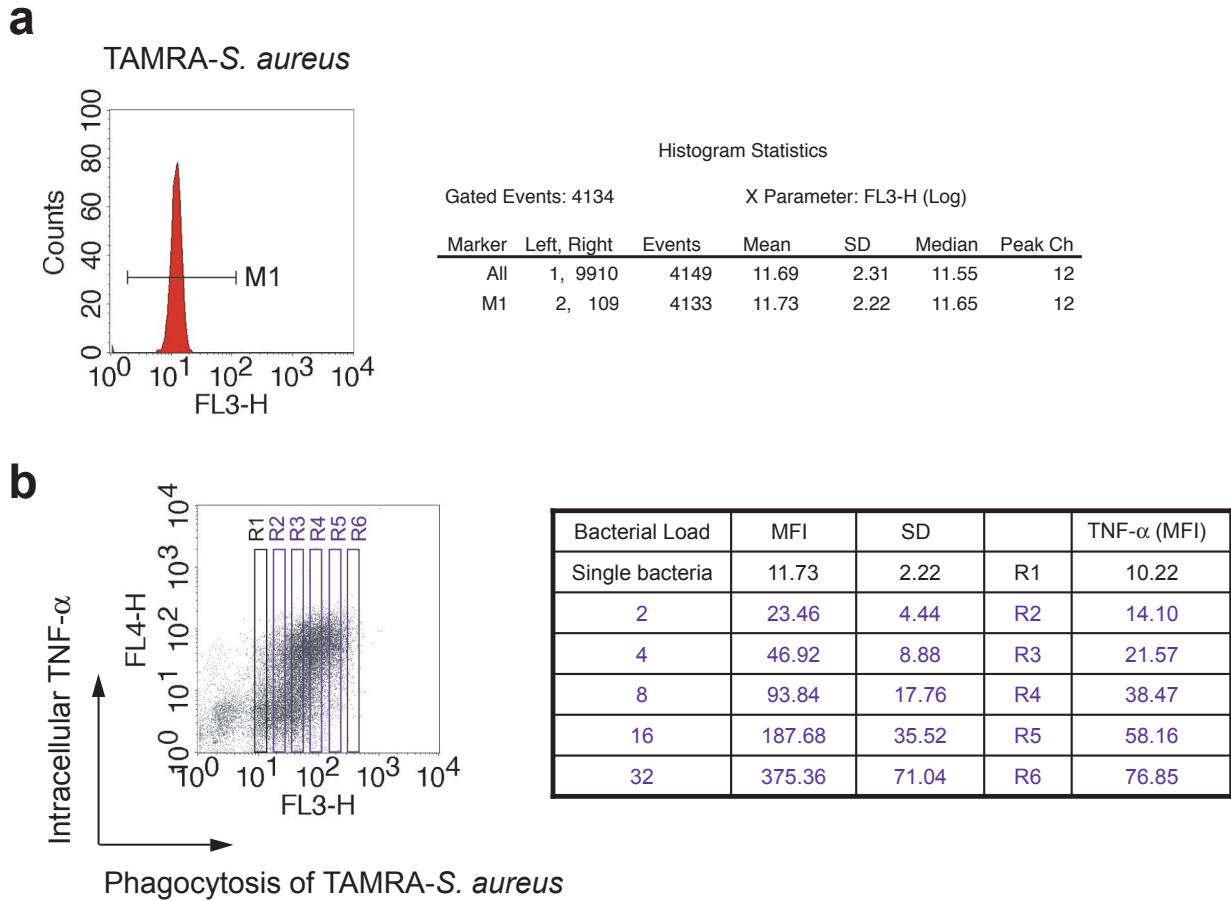

Figure SF2. **Intracellular TNF- $\alpha$  production in macrophages with defined bacterial loads.** (a) Mean of fluorescence intensity (MFI) of TAMRA-labeled *S. aureus* at the single-bacteria level was measured by flow cytometry. (b) Macrophages were fed with the TAMRA-*S. aureus* for 2 h. Phagocytosis and intracellular TNF- $\alpha$  were measured by flow cytometry. Total MFI  $\pm$  SD (at FL3-H) for one- or twofold increasing bacterial loads were predicted (table; right) based on the MFI  $\pm$  SD of a single bacteria observed in (a), which allows to define the regions (R1 - 6) of cells that had engulfed one- or twofold increasing numbers of bacteria (density plot; left). Intracellular TNF- $\alpha$  production (MFI at FL4-H) from the corresponding regions were then determined by the gating analysis (table; left), and these data are plotted against the number of bacteria engulfed as shown in Figure 1d (left).

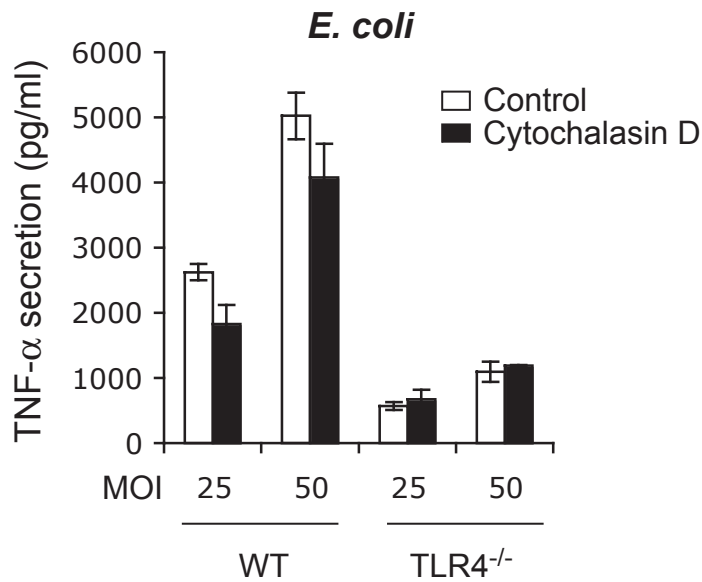

**Supplementary Figure 3. The nature of the ligand, and not the receptor, determines the need for internalization.**

The requirement for internalization on TLR4-dependent and TLR4-independent responses to *E. coli* was determined by monitoring the effect of blocking phagocytosis on cytokine production triggered in WT and Tlr4<sup>-/-</sup> cells stimulated with *E. coli*

**Table ST1. Protease inhibitor targets.**

| <b>Protease inhibitor</b> | <b>Targets*</b>                                                                              |
|---------------------------|----------------------------------------------------------------------------------------------|
| AEBSF                     | serine protease                                                                              |
| EACA                      | chymotrypsin, Factor VIIa, lysine carboxypeptidase, plasmin, plasminogen activator           |
| Antipain                  | serine protease, cysteine protease, some trypsin-like serine proteases                       |
| Aprotinin                 | serine protease                                                                              |
| Benzamidin HCl            | trypsin, trypsin-like enzymes, and serine proteases                                          |
| Bestatin                  | leucine aminopeptidase, aminopeptidase B, triamino peptidase                                 |
| Chymostatin               | chymotrypsin, chymotrypsin-like serine proteinases, chymases, lysosomal cysteine proteinases |
| E-64                      | cystein proteases                                                                            |
| EDTA                      | Zinc-dependent metalloproteinases                                                            |
| N-Ethylmaleimide          | cystein proteases                                                                            |
| Leupeptin                 | serine protease, thiol protease                                                              |
| Pepstatin                 | acid protease (aspartyl peptidases): pepsin, renin, cathepsin D, bovine chymosin, protease B |
| Phosphoramidon            | bacterial metalloendoproteinases, thermolysin, elastase (weak for collagenase)               |
| Trypsin inhibitor         | trypsin                                                                                      |

**Table ST1b. Specific targets of the protease inhibitor panel.**

\*summarized from the manufacturer's product information (Sigma).
